# Supplementary material for: Enterovirus 71 seroepidemiology in Taiwan in 2017 and comparison of those rates in 1997, 1999 and 2007
Source: PubMed Central journal article supplement (PMC6797108; doi:10.1371/journal.pone.0224110), 2019-10-17
Supplement: pone.0224110.s001.pdf [file pone.0224110.s001.pdf]

台灣城鄉之社區腸病毒 71 型血清流行病學調查-幼兒問卷

EV71 Seroepidemiology study in urban and rural areas in Taiwan:

Questionnaire for preschool children

Date : \_\_\_\_ / \_\_\_\_ / \_\_\_\_

一、基本資料與兒童照護

First, basic information and child care

|                                                                                                                                                                                                                                                                                                                                                                                                                                                                        |                                                                                                                                                                                                                                                                                                                                                     |                                    |
|------------------------------------------------------------------------------------------------------------------------------------------------------------------------------------------------------------------------------------------------------------------------------------------------------------------------------------------------------------------------------------------------------------------------------------------------------------------------|-----------------------------------------------------------------------------------------------------------------------------------------------------------------------------------------------------------------------------------------------------------------------------------------------------------------------------------------------------|------------------------------------|
| 1.被抽血人姓名：<br>1. Name of the study subject                                                                                                                                                                                                                                                                                                                                                                                                                              | 性別：<br>gender:                                                                                                                                                                                                                                                                                                                                      | 生日：民國 年 月 日<br>Date of birth : / / |
| 2.家長姓名：<br>2.Parent's name:<br><br>填表人為：<br>The name who fills in the form:                                                                                                                                                                                                                                                                                                                                                                                            | 聯絡方式(手機)<br>Contact information (mobile phone)                                                                                                                                                                                                                                                                                                      | (電話)<br>(phone)                    |
| 3.地址<br>3. Address                                                                                                                                                                                                                                                                                                                                                                                                                                                     |                                                                                                                                                                                                                                                                                                                                                     |                                    |
| 4.這個住處已經住了____年<br>4. This place has lived for (how many)years                                                                                                                                                                                                                                                                                                                                                                                                         | 住家是在：(請勾選)<br><input type="checkbox"/> 城市區, <input type="checkbox"/> 鄉村區, <input type="checkbox"/> 城市邊緣地(市郊), <input type="checkbox"/> 工業區<br>The home is at: (please tick)<br><input type="checkbox"/> urban area, <input type="checkbox"/> rural area, <input type="checkbox"/> urban fringe (suburban), <input type="checkbox"/> industrial area |                                    |
| 5.同住家庭人數共：____人<br>5. Living with family members: (how many) People                                                                                                                                                                                                                                                                                                                                                                                                    |                                                                                                                                                                                                                                                                                                                                                     |                                    |
| 6.小朋友手足數:(____人)<br>為____兄, 年齡分別為:(____)<br>為____姊, 年齡分別為:(____)<br>為____弟, 年齡分別為:(____)<br>為____妹, 年齡分別為:(____)<br>6.Number of children, brothers and sisters: (____ people)<br>____(how many) elder brothers, the ages are: (____)<br>____(how many) elder sister, the ages are: (____)<br>____(how many) younger brothers, the ages are: (____)<br>____(how many) younger sisters, the ages are: (____)                                                             |                                                                                                                                                                                                                                                                                                                                                     |                                    |
| 7.小朋友是否有慢性疾病<br>7. Does the child have chronic diseases?                                                                                                                                                                                                                                                                                                                                                                                                               | <input type="checkbox"/> 有, (請註明: _____)<br><input type="checkbox"/> 無,<br><input type="checkbox"/> Yes, (please specify: ) <input type="checkbox"/> No                                                                                                                                                                                             |                                    |
| 8.小朋友是否被餵過母乳<br>8. Has the child been fed breast milk?                                                                                                                                                                                                                                                                                                                                                                                                                 | <input type="checkbox"/> 是:從__月大到__月大,<br><input type="checkbox"/> 否<br><input type="checkbox"/> Yes: From month to month,<br><input type="checkbox"/> No                                                                                                                                                                                           |                                    |
| 9.小朋友是上幼稚園或托兒所?<br>9. Is the child attending a kindergarten or nursery?                                                                                                                                                                                                                                                                                                                                                                                                | <input type="checkbox"/> 是<br><input type="checkbox"/> 否<br><input type="checkbox"/> Yes<br><input type="checkbox"/> No                                                                                                                                                                                                                             |                                    |
| 10.小朋友若未上幼稚園或托兒所,主要照顧者為： <input type="checkbox"/> 褓姆, <input type="checkbox"/> 母親, <input type="checkbox"/> 父親, <input type="checkbox"/> 祖父母, <input type="checkbox"/> 其他：_____<br>10.If the child is not attending a kindergarten or nursery school, the main caregivers are:<br><input type="checkbox"/> Babysitter, <input type="checkbox"/> mother, <input type="checkbox"/> father, <input type="checkbox"/> grandparents, <input type="checkbox"/> others: _____ |                                                                                                                                                                                                                                                                                                                                                     |                                    |

11.家中是否有人為B型肝炎帶原者:  
有(請註明: \_\_\_\_\_)  
無  
 11. Is there anyone in the family who is a hepatitis B carrier:  
 Yes (please specify: \_\_\_\_\_)  
 No

12.家中主要飲水來源: 自來水, 井水, 泉水, 其他: \_\_\_\_\_  
 12. Main sources of drinking water in the home:  tap water,  well water,  spring water,  other: \_\_\_\_\_

二、腸病毒相關疾病及接觸史

Second, enterovirus-related diseases and exposure history

| 題目<br>topic                                                                                                           | 請選擇符合您的選項<br>Please select the option that matches your choice                                                                                                                                                                                                                                                                                                                                                                                                                                                                  |
|-----------------------------------------------------------------------------------------------------------------------|---------------------------------------------------------------------------------------------------------------------------------------------------------------------------------------------------------------------------------------------------------------------------------------------------------------------------------------------------------------------------------------------------------------------------------------------------------------------------------------------------------------------------------|
| 1.小孩是否得過手足口症?<br>1. Does the child have a medical history of hand, foot and mouth disease?                            | <input type="checkbox"/> 有, 幾次: <input type="checkbox"/> 1, <input type="checkbox"/> 2, <input type="checkbox"/> 3, <input type="checkbox"/> 4, <input type="checkbox"/> 大於 5 次<br><input type="checkbox"/> 無<br><input type="checkbox"/> 不知<br><input type="checkbox"/> Yes, several times: <input type="checkbox"/> 1, <input type="checkbox"/> 2, <input type="checkbox"/> 3, <input type="checkbox"/> 4, <input type="checkbox"/> more than 5 times<br><input type="checkbox"/> No<br><input type="checkbox"/> I don't know |
| 2.小孩是否得過咽峽炎?<br>2. Does the child have a medical history of herpangina?                                               | <input type="checkbox"/> 有, 幾次: <input type="checkbox"/> 1, <input type="checkbox"/> 2, <input type="checkbox"/> 3, <input type="checkbox"/> 4, <input type="checkbox"/> 大於 5 次<br><input type="checkbox"/> 無<br><input type="checkbox"/> 不知<br><input type="checkbox"/> Yes, several times: <input type="checkbox"/> 1, <input type="checkbox"/> 2, <input type="checkbox"/> 3, <input type="checkbox"/> 4, <input type="checkbox"/> more than 5 times<br><input type="checkbox"/> No<br><input type="checkbox"/> I don't know |
| 3.家人中是否有人得過咽峽炎或手足口症?<br>3. Did anyone in the family have herpangina or hand, foot and mouth disease in the past?      | <input type="checkbox"/> 有(與小孩的關係為: _____),<br><input type="checkbox"/> 無<br><input type="checkbox"/> 不知<br><input type="checkbox"/> Yes (the relationship with children is: ),<br><input type="checkbox"/> No<br><input type="checkbox"/> I don't know                                                                                                                                                                                                                                                                         |
| 4.小孩的同儕是否得過咽峽炎或手足口症?<br>4. Did the child's classmates have herpangina or hand, foot and mouth disease in the past?    | <input type="checkbox"/> 有<br><input type="checkbox"/> 無<br><input type="checkbox"/> 不知<br><input type="checkbox"/> Yes<br><input type="checkbox"/> No<br><input type="checkbox"/> I don't know                                                                                                                                                                                                                                                                                                                                 |
| 5.小孩是否曾與手足口症或咽峽炎患者接觸?<br>5. Did the child have contact with patients with hand, foot and mouth disease or herpangina? | <input type="checkbox"/> 有, 請勾選以下<br>接觸方式: _____握手, _____摟抱, _____親吻, _____餵食, _____遊玩,<br>_____其他方式: 註明 _____<br><input type="checkbox"/> 無<br><input type="checkbox"/> 不知<br><input type="checkbox"/> Yes, please tick the following<br>Contact:<br><input type="checkbox"/> shaking hands,<br><input type="checkbox"/> hugging,<br><input type="checkbox"/> kissing,                                                                                                                                                         |

|  |                                                                                                                                                                                         |
|--|-----------------------------------------------------------------------------------------------------------------------------------------------------------------------------------------|
|  | <input type="checkbox"/> sharing food,<br><input type="checkbox"/> playing,<br>Other ways: please specify _____<br><input type="checkbox"/> No<br><input type="checkbox"/> I don't know |
|--|-----------------------------------------------------------------------------------------------------------------------------------------------------------------------------------------|

三、疫苗接種史 (請問您打了下列疫苗否？請按健康手冊之疫苗接種紀錄填)：

Third, the history of vaccination (Do you have the following vaccine? Please fill in according to the vaccination record of the children health handbook):

健康手冊之疫苗接種紀錄可否影印給我們存檔確認以下資料  可  否

Can the vaccination record of the children health handbook be photocopied to us to confirm the following information?  Yes  No

| 疫苗名稱<br>Vaccine name                                                                                                                                             | ★「有」施打<br>(以下請勾)<br>★ "Yes"<br>Vaccination<br>(Please check below) | 若「有」施打，共幾劑<br>If you have a vaccine, how many doses were received | 若「有」施打，最後一劑日期<br>If you have a vaccine, please write down the date of last dose | ★「無」施打<br>(以下請勾)<br>★ "None"<br>vaccine<br>(Please check below) | ★「不知是否<br>有」施打<br>(以下請勾)<br>★ "I don't know Whether the vaccine was received |
|------------------------------------------------------------------------------------------------------------------------------------------------------------------|--------------------------------------------------------------------|-------------------------------------------------------------------|---------------------------------------------------------------------------------|-----------------------------------------------------------------|------------------------------------------------------------------------------|
| 1. B 型肝炎疫苗：<br>Hepatitis B vaccine                                                                                                                               | <input type="checkbox"/> 有<br><input type="checkbox"/> Yes         | 幾劑<br>how many _____<br>doses                                     | 年 月 日<br>____year__month<br>____day                                             | <input type="checkbox"/> 無<br><input type="checkbox"/> NO       | <input type="checkbox"/> 不知<br><input type="checkbox"/> Unknown              |
| 2. 卡介苗核 BCG 疫苗<br>(Bacillus Calmette-Guérin (BCG) vaccine)                                                                                                       | <input type="checkbox"/> 有<br><input type="checkbox"/> Yes         | 幾劑<br>how many _____<br>doses                                     | 年 月 日<br>____year__month<br>____day                                             | <input type="checkbox"/> 無<br><input type="checkbox"/> NO       | <input type="checkbox"/> 不知<br><input type="checkbox"/> Unknown              |
| 3. 五合一疫苗<br>DTaP-Hib-IPV<br><br>Diphtheria and tetanus toxoid with acellular pertussis vaccine, Haemophilus influenzae type b vaccine, Inactivated polio vaccine | <input type="checkbox"/> 有<br><input type="checkbox"/> Yes         | 幾劑<br>how many _____<br>doses                                     | 年 月 日<br>____year__month<br>____day                                             | <input type="checkbox"/> 無<br><input type="checkbox"/> NO       | <input type="checkbox"/> 不知<br><input type="checkbox"/> Unknown              |
| 4. 肺炎鏈球菌疫苗<br>Pneumococcal conjugate vaccine                                                                                                                     | <input type="checkbox"/> 有<br><input type="checkbox"/> Yes         | 幾劑<br>how many _____<br>doses                                     | 年 月 日<br>____year__month<br>____day                                             | <input type="checkbox"/> 無<br><input type="checkbox"/> NO       | <input type="checkbox"/> 不知<br><input type="checkbox"/> Unknown              |

|                                                        |                                                            |                            |                                    |                                                           |                                                                 |
|--------------------------------------------------------|------------------------------------------------------------|----------------------------|------------------------------------|-----------------------------------------------------------|-----------------------------------------------------------------|
| 5.麻疹/腮腺炎/德國麻疹疫苗<br>Measles, mumps, and rubella vaccine | <input type="checkbox"/> 有<br><input type="checkbox"/> Yes | 幾劑<br>how many _____ doses | 年 月 日<br>___year___month<br>___day | <input type="checkbox"/> 無<br><input type="checkbox"/> NO | <input type="checkbox"/> 不知<br><input type="checkbox"/> Unknown |
| 6.水痘疫苗<br>Chickenpox Vaccine                           | <input type="checkbox"/> 有<br><input type="checkbox"/> Yes | 幾劑<br>how many _____ doses | 年 月 日<br>___year___month<br>___day | <input type="checkbox"/> 無<br><input type="checkbox"/> NO | <input type="checkbox"/> 不知<br><input type="checkbox"/> Unknown |
| 7.日本腦炎疫苗<br>Japanese encephalitis vaccine              | <input type="checkbox"/> 有<br><input type="checkbox"/> Yes | 幾劑<br>how many _____ doses | 年 月 日<br>___year___month<br>___day | <input type="checkbox"/> 無<br><input type="checkbox"/> NO | <input type="checkbox"/> 不知<br><input type="checkbox"/> Unknown |
| 8.A 型肝炎疫苗<br>Hepatitis A vaccine                       | <input type="checkbox"/> 有<br><input type="checkbox"/> Yes | 幾劑<br>how many _____ doses | 年 月 日<br>___year___month<br>___day | <input type="checkbox"/> 無<br><input type="checkbox"/> NO | <input type="checkbox"/> 不知<br><input type="checkbox"/> Unknown |
