# Supplementary material for: Enterovirus 71 seroepidemiology in Taiwan in 2017 and comparison of those rates in 1997, 1999 and 2007
Source: PubMed Central journal article supplement (PMC6797108; doi:10.1371/journal.pone.0224110), 2019-10-17
Supplement: pone.0224110.s002.pdf [file pone.0224110.s002.pdf]

台灣城鄉之社區腸病毒 71 型血清流行病學調查-學生幼兒問卷  
**EV71 Seroepidemiology study in urban and rural areas in Taiwan:**  
**Questionnaire for students**

Date : \_\_\_\_ / \_\_\_\_ / \_\_\_\_

一、基本資料

First, basic information

|                                                                                                                                                                                                                                                                                                                                                                                                                       |                                                                                                                                                                                                                                                                                                                                                     |                                                                  |
|-----------------------------------------------------------------------------------------------------------------------------------------------------------------------------------------------------------------------------------------------------------------------------------------------------------------------------------------------------------------------------------------------------------------------|-----------------------------------------------------------------------------------------------------------------------------------------------------------------------------------------------------------------------------------------------------------------------------------------------------------------------------------------------------|------------------------------------------------------------------|
| 1. 被抽血人姓名：<br>1. Name of the study subject                                                                                                                                                                                                                                                                                                                                                                            | 性別：<br>gender:                                                                                                                                                                                                                                                                                                                                      | 生日：民國 ____ 年 ____ 月 ____ 日<br>Date of birth : ____ / ____ / ____ |
| 2. 家長姓名：<br>1. Name of the person being drawn<br>填表人為：<br>The name who fills in the form:                                                                                                                                                                                                                                                                                                                             | 聯絡方式(手機)<br>Contact information (mobile phone)                                                                                                                                                                                                                                                                                                      | (電話)<br>(phone)                                                  |
| 3. 地址<br>3. Address                                                                                                                                                                                                                                                                                                                                                                                                   |                                                                                                                                                                                                                                                                                                                                                     |                                                                  |
| 4. 這個住處已經住了 ____ 年<br>4. This place has lived for (how many) years                                                                                                                                                                                                                                                                                                                                                    | 住家是在：(請勾選)<br><input type="checkbox"/> 城市區, <input type="checkbox"/> 鄉村區, <input type="checkbox"/> 城市邊緣地(市郊), <input type="checkbox"/> 工業區<br>The home is at: (please tick)<br><input type="checkbox"/> urban area, <input type="checkbox"/> rural area, <input type="checkbox"/> urban fringe (suburban), <input type="checkbox"/> industrial area |                                                                  |
| 5. 同住家庭人數共：____ 人<br>5. Living with family members: (how many) People                                                                                                                                                                                                                                                                                                                                                 |                                                                                                                                                                                                                                                                                                                                                     |                                                                  |
| 6. 小朋友手足數：(____ 人)<br>為 ____ 兄，年齡分別為：(____)<br>為 ____ 姊，年齡分別為：(____)<br>為 ____ 弟，年齡分別為：(____)<br>為 ____ 妹，年齡分別為：(____)<br>6. Number of children, brothers and sisters: (____ people)<br>____ (how many) elder brothers, the ages are: (____)<br>____ (how many) elder sister, the ages are: (____)<br>____ (how many) younger brothers, the ages are: (____)<br>____ (how many) younger sisters, the ages are: (____) |                                                                                                                                                                                                                                                                                                                                                     |                                                                  |
| 7. 小朋友是否有慢性疾病<br>7. Does the child have chronic diseases?                                                                                                                                                                                                                                                                                                                                                             | <input type="checkbox"/> 有，(請註明：____)<br><input type="checkbox"/> 無，<br><input type="checkbox"/> Yes, (please specify: ) <input type="checkbox"/> No                                                                                                                                                                                                |                                                                  |
| 8. 小朋友是否被餵過母乳<br>8. Has the child been fed breast milk?                                                                                                                                                                                                                                                                                                                                                               | <input type="checkbox"/> 是：從 ____ 月大到 ____ 月大，<br><input type="checkbox"/> 否<br><input type="checkbox"/> Yes<br><input type="checkbox"/> No                                                                                                                                                                                                         |                                                                  |
| 9. 家中是否有人為B型肝炎帶原者：<br><input type="checkbox"/> 有(請註明：____)<br><input type="checkbox"/> 無<br>9. Is there anyone in the family who is a hepatitis B carrier:<br><input type="checkbox"/> Yes (please specify: ____)<br><input type="checkbox"/> No                                                                                                                                                                      |                                                                                                                                                                                                                                                                                                                                                     |                                                                  |
| 10. 家中主要飲水來源： <input type="checkbox"/> 自來水, <input type="checkbox"/> 井水, <input type="checkbox"/> 泉水, <input type="checkbox"/> 其他：____<br>10. Main sources of drinking water in the home: <input type="checkbox"/> tap water, <input type="checkbox"/> well water, <input type="checkbox"/> spring water, <input type="checkbox"/> other: ____                                                                        |                                                                                                                                                                                                                                                                                                                                                     |                                                                  |

二、腸病毒相關疾病及接觸史

Second, enterovirus-related diseases and exposure history

| <p>題目<br/>topic</p>                                                                                                            | <p>請選擇符合您的選項<br/>Please select the option that matches your choice</p>                                                                                                                                                                                                                                                                                                                                                                                                                                                                                                                                                        |
|--------------------------------------------------------------------------------------------------------------------------------|-------------------------------------------------------------------------------------------------------------------------------------------------------------------------------------------------------------------------------------------------------------------------------------------------------------------------------------------------------------------------------------------------------------------------------------------------------------------------------------------------------------------------------------------------------------------------------------------------------------------------------|
| <p>1.小孩是否得過手足口症?<br/>1. Does the child have a medical history of hand, foot and mouth disease?</p>                             | <p><input type="checkbox"/>有，幾次：<input type="checkbox"/>1, <input type="checkbox"/>2, <input type="checkbox"/>3, <input type="checkbox"/>4, <input type="checkbox"/>大於 5 次<br/> <input type="checkbox"/>無<br/> <input type="checkbox"/>不知<br/> <input type="checkbox"/> Yes, several times: <input type="checkbox"/>1, <input type="checkbox"/>2, <input type="checkbox"/>3, <input type="checkbox"/>4, <input type="checkbox"/> more than 5 times<br/> <input type="checkbox"/>No<br/> <input type="checkbox"/> I don't know</p>                                                                                             |
| <p>2.小孩是否得過咽峽炎?<br/>2. Does the child have a medical history of herpangina?</p>                                                | <p><input type="checkbox"/>有，幾次：<input type="checkbox"/>1, <input type="checkbox"/>2, <input type="checkbox"/>3, <input type="checkbox"/>4, <input type="checkbox"/>大於 5 次<br/> <input type="checkbox"/>無<br/> <input type="checkbox"/>不知<br/> <input type="checkbox"/> Yes, several times: <input type="checkbox"/>1, <input type="checkbox"/>2, <input type="checkbox"/>3, <input type="checkbox"/>4, <input type="checkbox"/> more than 5 times<br/> <input type="checkbox"/>No<br/> <input type="checkbox"/> I don't know</p>                                                                                             |
| <p>3.家人中是否有人得過咽峽炎或手足口症?<br/>3. Did anyone in the family have herpangina or hand, foot and mouth disease in the past?</p>       | <p><input type="checkbox"/>有(與小孩的關係為：_____),<br/> <input type="checkbox"/>無<br/> <input type="checkbox"/>不知<br/> <input type="checkbox"/> Yes (the relationship with children is: ----- ),<br/> <input type="checkbox"/>No<br/> <input type="checkbox"/> I don't know</p>                                                                                                                                                                                                                                                                                                                                                     |
| <p>4.您的鄰居是否得過咽峽炎或手足口症?<br/>4. Did your neighbors have herpangina or hand, foot and mouth disease in the past?</p>              | <p><input type="checkbox"/>有<br/> <input type="checkbox"/>無<br/> <input type="checkbox"/>不知<br/> <input type="checkbox"/> Yes<br/> <input type="checkbox"/>No<br/> <input type="checkbox"/> I don't know</p>                                                                                                                                                                                                                                                                                                                                                                                                                  |
| <p>5.小孩的同學是否得過咽峽炎或手足口症?<br/>5. Did the child's classmates have had herpangina or hand, foot and mouth disease in the past?</p> | <p><input type="checkbox"/>有<br/> <input type="checkbox"/>無<br/> <input type="checkbox"/>不知<br/> <input type="checkbox"/> Yes<br/> <input type="checkbox"/>No<br/> <input type="checkbox"/> I don't know</p>                                                                                                                                                                                                                                                                                                                                                                                                                  |
| <p>6.小孩是否曾與手足口症或咽峽炎患者接觸?<br/>6. Did the child have contact with patients with hand, foot and mouth disease or herpangina?</p>  | <p><input type="checkbox"/>有，請勾選以下<br/> 接觸方式：<input type="checkbox"/>握手，<input type="checkbox"/>摟抱，<input type="checkbox"/>親吻，<input type="checkbox"/>餵食，<input type="checkbox"/>遊玩，<br/> <input type="checkbox"/>其他方式：註明_____</p> <p><input type="checkbox"/>無<br/> <input type="checkbox"/>不知<br/> <input type="checkbox"/> Yes, please tick the following<br/> Contact:<br/> <input type="checkbox"/>shaking hands,<br/> <input type="checkbox"/>hugging,<br/> <input type="checkbox"/>kissing,<br/> <input type="checkbox"/>sharing food,<br/> <input type="checkbox"/>playing,<br/> Other ways: please specify _____</p> |

No  
 I don't know

三、疫苗接種史 (請問您打了下列疫苗否? 請按健康手冊之疫苗接種紀錄填):

Third, the history of vaccination (Do you have the following vaccine? Please fill in according to the vaccination record of the children health handbook):

健康手冊之疫苗接種紀錄可否影印給我們存檔確認以下資料 可 否

Can the vaccination record of the children health handbook be photocopied to us to confirm the following information? Yes  No

| 疫苗名稱<br>Vaccine name                                                                                                                                         | ★「有」施打<br>(以下請勾)<br>★ "Yes"<br>Vaccination<br>(Please check below) | 若「有」施打, 共幾劑<br>If you have a vaccine, how many doses were received | 若「有」施打, 最後一劑日期<br>If you have a vaccine, please write down the date of last dose | ★「無」施打<br>(以下請勾)<br>★ "None"<br>vaccine<br>(Please check below) | ★「不知是否<br>有」施打<br>(以下請勾)<br>★ "I don't know Whether the vaccine was received |
|--------------------------------------------------------------------------------------------------------------------------------------------------------------|--------------------------------------------------------------------|--------------------------------------------------------------------|----------------------------------------------------------------------------------|-----------------------------------------------------------------|------------------------------------------------------------------------------|
| 1. B型肝炎疫苗:<br>Hepatitis B vaccine                                                                                                                            | <input type="checkbox"/> 有<br><input type="checkbox"/> Yes         | 幾劑<br>how many _____ doses                                         | 年 月 日<br>____year____month<br>____day                                            | <input type="checkbox"/> 無<br><input type="checkbox"/> NO       | <input type="checkbox"/> 不知<br><input type="checkbox"/> Unknown              |
| 2. 卡介苗核 BCG 疫苗<br>Bacillus Calmette-Guérin (BCG) vaccine                                                                                                     | <input type="checkbox"/> 有<br><input type="checkbox"/> Yes         | 幾劑<br>how many _____ doses                                         | 年 月 日<br>____year____month<br>____day                                            | <input type="checkbox"/> 無<br><input type="checkbox"/> NO       | <input type="checkbox"/> 不知<br><input type="checkbox"/> Unknown              |
| 3. 五合一疫苗<br>DTaP-Hib-IPV<br>Diphtheria and tetanus toxoid with acellular pertussis vaccine, Haemophilus influenzae type b vaccine, Inactivated polio vaccine | <input type="checkbox"/> 有<br><input type="checkbox"/> Yes         | 幾劑<br>how many _____ doses                                         | 年 月 日<br>____year____month<br>____day                                            | <input type="checkbox"/> 無<br><input type="checkbox"/> NO       | <input type="checkbox"/> 不知<br><input type="checkbox"/> Unknown              |
| 4. 肺炎鏈球菌疫苗<br>Pneumococcal conjugate vaccine                                                                                                                 | <input type="checkbox"/> 有<br><input type="checkbox"/> Yes         | 幾劑<br>how many _____ doses                                         | 年 月 日<br>____year____month<br>____day                                            | <input type="checkbox"/> 無<br><input type="checkbox"/> NO       | <input type="checkbox"/> 不知<br><input type="checkbox"/> Unknown              |
| 5. 麻疹/腮腺炎/德國麻疹疫苗<br>Measles, mumps, and rubella vaccine                                                                                                      | <input type="checkbox"/> 有<br><input type="checkbox"/> Yes         | 幾劑<br>how many _____ doses                                         | 年 月 日<br>____year____month<br>____day                                            | <input type="checkbox"/> 無<br><input type="checkbox"/> NO       | <input type="checkbox"/> 不知<br><input type="checkbox"/> Unknown              |
| 6. 水痘疫苗<br>Chickenpox                                                                                                                                        | <input type="checkbox"/> 有                                         | 幾劑                                                                 | 年 月 日                                                                            | <input type="checkbox"/> 無                                      | <input type="checkbox"/> 不知                                                  |

|                                                |                                                            |                               |                                 |                                                           |                                                                 |
|------------------------------------------------|------------------------------------------------------------|-------------------------------|---------------------------------|-----------------------------------------------------------|-----------------------------------------------------------------|
| Vaccine                                        | <input type="checkbox"/> Yes                               | how many _____<br>doses       | ____year__month<br>day          | <input type="checkbox"/> NO                               | <input type="checkbox"/> Unknown                                |
| 7.日本腦炎疫苗<br>Japanese encephali-<br>tis vaccine | <input type="checkbox"/> 有<br><input type="checkbox"/> Yes | 幾劑<br>how many _____<br>doses | 年 月 日<br>____year__month<br>day | <input type="checkbox"/> 無<br><input type="checkbox"/> NO | <input type="checkbox"/> 不知<br><input type="checkbox"/> Unknown |
| 8.A 型肝炎疫苗<br>Hepatitis A vaccine               | <input type="checkbox"/> 有<br><input type="checkbox"/> Yes | 幾劑<br>how many _____<br>doses | 年 月 日<br>____year__month<br>day | <input type="checkbox"/> 無<br><input type="checkbox"/> NO | <input type="checkbox"/> 不知<br><input type="checkbox"/> Unknown |
