# Supplementary material for: Enterovirus 71 seroepidemiology in Taiwan in 2017 and comparison of those rates in 1997, 1999 and 2007
Source: PubMed Central journal article supplement (PMC6797108; doi:10.1371/journal.pone.0224110), 2019-10-17
Supplement: pone.0224110.s003.pdf [file pone.0224110.s003.pdf]

台灣城鄉之社區腸病毒 71 型血清流行病學調查-成人

EV71 Seroepidemiology study in urban and rural areas in Taiwan:  
Questionnaire for adults

Date : \_\_\_ / \_\_\_ / \_\_\_

一、基本資料

First, basic information

|                                                                                                                                                                                                                                                            |                                                                                                                                                                                                                                                                                                                                                     |                                               |
|------------------------------------------------------------------------------------------------------------------------------------------------------------------------------------------------------------------------------------------------------------|-----------------------------------------------------------------------------------------------------------------------------------------------------------------------------------------------------------------------------------------------------------------------------------------------------------------------------------------------------|-----------------------------------------------|
| 1. 被抽血人姓名：<br>1. Name of the study subject                                                                                                                                                                                                                 | 性別：<br>gender:                                                                                                                                                                                                                                                                                                                                      | 生日：民國 年 月 日<br>Date of birth: ___ / ___ / ___ |
| 聯絡方式(手機)<br>Contact information (mobile phone)                                                                                                                                                                                                             | (電話)<br>(phone)                                                                                                                                                                                                                                                                                                                                     |                                               |
| 2. 地址<br>2. Address                                                                                                                                                                                                                                        |                                                                                                                                                                                                                                                                                                                                                     |                                               |
| 3. 這個住處已經住了___年<br>3. This place has lived for (how many) years                                                                                                                                                                                            | 住家是在：(請勾選)<br><input type="checkbox"/> 城市區, <input type="checkbox"/> 鄉村區, <input type="checkbox"/> 城市邊緣地(市郊), <input type="checkbox"/> 工業區<br>The home is at: (please tick)<br><input type="checkbox"/> urban area, <input type="checkbox"/> rural area, <input type="checkbox"/> urban fringe (suburban), <input type="checkbox"/> industrial area |                                               |
| 4. 同住家庭人數共：___人<br>4. Living with family members: ___ (how many) People                                                                                                                                                                                    |                                                                                                                                                                                                                                                                                                                                                     |                                               |
| 5. 您是否有小孩，有，請填以下：<br>為___男，年齡分別為：(_____)<br>為___女，年齡分別為：(_____)<br>5. Do you have children, yes, please fill in the following:<br>___(how many) sons, the ages are: (_____)<br>___(how many) daughters, the ages are: (_____)                              |                                                                                                                                                                                                                                                                                                                                                     |                                               |
| 6. 您是否有慢性疾病?<br>6. Do you have a chronic disease?                                                                                                                                                                                                          | <input type="checkbox"/> 有，(請註明：_____)<br><input type="checkbox"/> 無，<br><input type="checkbox"/> Yes, (please specify: ) <input type="checkbox"/> No                                                                                                                                                                                               |                                               |
| 7. 您是否為B型肝炎帶原者?<br>7. Are you a hepatitis B carrier:<br><input type="checkbox"/> 是,<br><input type="checkbox"/> 否,<br><input type="checkbox"/> 不知<br><input type="checkbox"/> Yes<br><input type="checkbox"/> No<br><input type="checkbox"/> I don' t know |                                                                                                                                                                                                                                                                                                                                                     |                                               |
| 8. 家中是否有人為B型肝炎帶原者:<br>8. Is there anyone in the family who is a hepatitis B carrier:<br><input type="checkbox"/> 有(請註明：_____)<br><input type="checkbox"/> 無<br><input type="checkbox"/> Yes (please specify:_____)<br><input type="checkbox"/> No          |                                                                                                                                                                                                                                                                                                                                                     |                                               |
| 9. 家中主要飲水來源： <input type="checkbox"/> 自來水, <input type="checkbox"/> 井水, <input type="checkbox"/> 泉水, <input type="checkbox"/> 其他：_____                                                                                                                     |                                                                                                                                                                                                                                                                                                                                                     |                                               |

9. Main sources of drinking water in the home:  tap water,  well water,  spring water,  
 other: \_\_\_\_\_

二、腸病毒相關疾病及接觸史

Second, enterovirus-related diseases and exposure history

| 題目                                                                                                                | 請選擇符合您的選項                                                                                                                                                                                                                                                                                                                                                                                                                                                                                                                                                                                                                                                                                |
|-------------------------------------------------------------------------------------------------------------------|------------------------------------------------------------------------------------------------------------------------------------------------------------------------------------------------------------------------------------------------------------------------------------------------------------------------------------------------------------------------------------------------------------------------------------------------------------------------------------------------------------------------------------------------------------------------------------------------------------------------------------------------------------------------------------------|
| 1. 您是否得過手足口症？<br>1. Did you have hand, foot and mouth disease in the past?                                        | <input type="checkbox"/> 有，幾次： <input type="checkbox"/> 1, <input type="checkbox"/> 2, <input type="checkbox"/> 3, <input type="checkbox"/> 4, <input type="checkbox"/> 大於5次<br><input type="checkbox"/> 無<br><input type="checkbox"/> 不知<br><input type="checkbox"/> Yes, several times: <input type="checkbox"/> 1, <input type="checkbox"/> 2, <input type="checkbox"/> 3, <input type="checkbox"/> 4, <input type="checkbox"/> more than 5 times<br><input type="checkbox"/> No<br><input type="checkbox"/> I don' t know                                                                                                                                                            |
| 2. 您是否得過咽峽炎？<br>2. Did you have herpangina in the past?                                                           | <input type="checkbox"/> 有，幾次： <input type="checkbox"/> 1, <input type="checkbox"/> 2, <input type="checkbox"/> 3, <input type="checkbox"/> 4, <input type="checkbox"/> 大於5次<br><input type="checkbox"/> 無<br><input type="checkbox"/> 不知<br><input type="checkbox"/> Yes, several times: <input type="checkbox"/> 1, <input type="checkbox"/> 2, <input type="checkbox"/> 3, <input type="checkbox"/> 4, <input type="checkbox"/> more than 5 times<br><input type="checkbox"/> No<br><input type="checkbox"/> I don' t know                                                                                                                                                            |
| 3. 家人中是否有人得過咽峽炎或手足口症？<br>3. Did anyone in the family have herpangina or hand, foot and mouth disease in the past? | <input type="checkbox"/> 有(與您的關係為：_____)，<br><input type="checkbox"/> 無<br><input type="checkbox"/> 不知<br><input type="checkbox"/> Yes (the relationship with you is: )<br><input type="checkbox"/> No<br><input type="checkbox"/> I don' t know                                                                                                                                                                                                                                                                                                                                                                                                                                         |
| 4. 您的鄰居是否得過咽峽炎或手足口症？<br>4. Did your neighbors have herpangina or hand, foot and mouth disease in the past?        | <input type="checkbox"/> 有<br><input type="checkbox"/> 無<br><input type="checkbox"/> 不知<br><input type="checkbox"/> Yes<br><input type="checkbox"/> No<br><input type="checkbox"/> I don' t know                                                                                                                                                                                                                                                                                                                                                                                                                                                                                         |
| 5. 您是否曾與手足口症或咽峽炎患者接觸？<br>5. Did you have contact with patients with hand, foot and mouth disease or herpangina?   | <input type="checkbox"/> 有，請勾選以下<br>接觸方式： <input type="checkbox"/> 握手， <input type="checkbox"/> 摟抱， <input type="checkbox"/> 親吻， <input type="checkbox"/> 餵食， <input type="checkbox"/> 遊玩，<br><input type="checkbox"/> 其他方式：註明_____<br><input type="checkbox"/> 無<br><input type="checkbox"/> 不知<br><input type="checkbox"/> Yes, please tick the following<br>Contact:<br><input type="checkbox"/> shaking hands,<br><input type="checkbox"/> hugging,<br><input type="checkbox"/> kissing,<br><input type="checkbox"/> sharing food,<br><input type="checkbox"/> playing,<br>Other ways: please specify _____<br><input type="checkbox"/> No<br><input type="checkbox"/> I don' t know |
| 6. 您的小孩是否得過手足口症？                                                                                                  | <input type="checkbox"/> 有，幾次： <input type="checkbox"/> 1, <input type="checkbox"/> 2, <input type="checkbox"/> 3, <input type="checkbox"/> 4, <input type="checkbox"/> 大於5次                                                                                                                                                                                                                                                                                                                                                                                                                                                                                                             |

|                                                                      |                                                                                                                                                                                                                                                                                                                                                                                                                                                                                                                               |
|----------------------------------------------------------------------|-------------------------------------------------------------------------------------------------------------------------------------------------------------------------------------------------------------------------------------------------------------------------------------------------------------------------------------------------------------------------------------------------------------------------------------------------------------------------------------------------------------------------------|
| 6. Did your children have hand, foot and mouth disease in the past?  | <input type="checkbox"/> 無<br><input type="checkbox"/> 不知<br><input type="checkbox"/> Yes, several times: <input type="checkbox"/> 1, <input type="checkbox"/> 2, <input type="checkbox"/> 3, <input type="checkbox"/> 4, <input type="checkbox"/> more than 5 times<br><input type="checkbox"/> No<br><input type="checkbox"/> I don' t know                                                                                                                                                                                 |
| 7. 您的小孩是否得過咽峽炎?<br>7. Did your children have herpangina in the past? | <input type="checkbox"/> 有，幾次： <input type="checkbox"/> 1, <input type="checkbox"/> 2, <input type="checkbox"/> 3, <input type="checkbox"/> 4, <input type="checkbox"/> 大於5次<br><input type="checkbox"/> 無<br><input type="checkbox"/> 不知<br><input type="checkbox"/> Yes, several times: <input type="checkbox"/> 1, <input type="checkbox"/> 2, <input type="checkbox"/> 3, <input type="checkbox"/> 4, <input type="checkbox"/> more than 5 times<br><input type="checkbox"/> No<br><input type="checkbox"/> I don' t know |

### 三、疫苗接種史

Third, the history of vaccination

請問您打了下列疫苗否？

Do you have the following vaccine

| 疫苗名稱<br>Vaccine name               | ★「有」施打<br>(以下請勾)<br>★<br>"Yes" Vaccination<br>(Please check below) | 若「有」施打，共幾劑<br>If you have a vaccine, how many doses were received | 若「有」施打，最後一劑日期<br>If you have a vaccine, please write down the date of last dose | ★「無」施打<br>(以下請勾)<br>★"None" vaccine<br>(Please check below) | ★「不知是否有」施打<br>(以下請勾)<br>★ "I don' t know Whether the vaccine was received |
|------------------------------------|--------------------------------------------------------------------|-------------------------------------------------------------------|---------------------------------------------------------------------------------|-------------------------------------------------------------|---------------------------------------------------------------------------|
| 1. A 型肝炎疫苗<br>Hepatitis A vaccine  | <input type="checkbox"/> 有<br><input type="checkbox"/> Yes         | 幾劑<br>how many<br>____<br>doses                                   | 年 月 日<br>__year__month<br>__day                                                 | <input type="checkbox"/> 無<br><input type="checkbox"/> NO   | <input type="checkbox"/> 不知<br><input type="checkbox"/> Unknown           |
| 2. B 型肝炎疫苗：<br>Hepatitis B vaccine | <input type="checkbox"/> 有<br><input type="checkbox"/> Yes         | 幾劑<br>how many<br>____<br>doses                                   | 年 月 日<br>__year__month<br>__day                                                 | <input type="checkbox"/> 無<br><input type="checkbox"/> NO   | <input type="checkbox"/> 不知<br><input type="checkbox"/> Unknown           |
| 3. 水痘疫苗<br>Chickenpox Vaccine      | <input type="checkbox"/> 有<br><input type="checkbox"/> Yes         | 幾劑<br>how many<br>____<br>doses                                   | 年 月 日<br>__year__month<br>__day                                                 | <input type="checkbox"/> 無<br><input type="checkbox"/> NO   | <input type="checkbox"/> 不知<br><input type="checkbox"/> Unknown           |
